# Supplementary material for: Terminal-selective healing of perovskite crystals for air-fabricated high-performance flexible perovskite solar cells
Source: Royal Society of Chemistry journal article supplement (doi:10.1039/d5cc07007d), 2026-01-01
Supplement: d5cc07007d1.pdf [file d5cc07007d1.pdf]

## Supporting Information

# **Terminal-selective Healing of Perovskite Crystals for Air-Fabricated High-performance Flexible Perovskite Solar Cells**

Shendong Xu,<sup>a</sup> Yuli Tao,<sup>b</sup> Ke Yang,<sup>\*a</sup> Yongtao Li,<sup>\*c</sup> Haiying Zheng,<sup>d</sup> Guozhen Liu<sup>\*e</sup> and Xu Pan<sup>\*b</sup>

<sup>a</sup>School of Carbon Neutrality Science and Engineering, Anhui University of Science and Technology, Hefei 231131, P. R. China. E-mail: 2023183@aust.edu.cn (K. Yang)

<sup>b</sup>Key Laboratory of Photovoltaic and Energy Conservation Materials, Institute of Solid State Physics, Hefei Institutes of Physical Science, Chinese Academy of Sciences, Hefei 230031, P. R. China. E-mail: xpan@rntek.cas.cn (X. Pan)

<sup>c</sup>School of Materials Science and Engineering, Anhui University of Technology, Maanshan 243002, P. R. China. E-mail: liyongtao@ahut.edu.cn (Y. Li)

<sup>d</sup>School of Materials Science and Engineering, Dalian Jiaotong University, Dalian 116028, P. R. China

<sup>e</sup>State Key Laboratory of Fine Chemicals, School of Chemistry, Dalian University of Technology, Dalian 116024, P. R. China. E-mail: gzliu@dlut.edu.cn (G. Liu)

## **Experimental section**

### **Materials**

**Basic materials:** Methylammonium iodide (MAI), formamidinium iodide (FAI, 99.9%), methylammonium bromine (MABr), methylamine Chloride (MACl) and lead(II) iodide ( $\text{PbI}_2$ , 99.999%), lead (II) bromide ( $\text{PbBr}_2$ , >98%) and cesium iodide (CsI, >99%) both purchased from Advanced Election Technology Co. Spiro-MeOTAD (99.86%) was purchased from Xi'an Polymer Light Technology manufacturers. The  $\text{SnO}_2$  colloid precursor (tin (IV) oxide, 15% in  $\text{H}_2\text{O}$  colloidal dispersion) was obtained from Alfa Aesar. DMSO (dimethylsulfoxide 99.50%), DMF (N,N-dimethylformamide 99.99%), chlorobenzene and isopropanol (IPA) from Sinopharm and Sigma Aldrich.

**Special materials:** The hexadecyltrimethylammonium hexafluorophosphate ( $\text{HTAPF}_6$ ) and hexadecyltrimethylammonium tetrafluoroborate ( $\text{HTABF}_4$ ) were purchased from aladdin.

**Electrode materials:** ITO-PEN also purchased from Advanced Election Technology Co. Au (99.99%) was purchased from ZhongNuo Advanced Material Technology or any other company as long as the purity is above 4 nines (99.99%).

All the commercial materials were used as received without further purification.

### **Flexible Perovskite Solar Cells (f-PSCs) Structure**

Device structure is PEN-ITO/ $\text{SnO}_2$ /perovskite/ spiro-MeOTAD/Au.

## **Preparation of Perovskite Precursor Solution**

The perovskite precursor solutions (The concentration of lead ions is 1.6 M) of  $(\text{FAPbI}_3)_{0.925}(\text{MAPbBr}_3)_{0.05}(\text{CsPbI}_3)_{0.025}$  was fabricated by dissolving the corresponding amount of  $\text{PbI}_2$ ,  $\text{PbBr}_2$ ,  $\text{FAI}$ ,  $\text{CsI}$ ,  $\text{MAI}$ ,  $\text{MABr}$ ,  $\text{MACl}$  powders in anhydrous  $\text{N,N}$ -dimethylformamide (DMF) and dimethyl sulfoxide (DMSO) mixed solvent (DMF:DMSO = 4:1) with stirring at 25 °C for 60 min. (The following text is referred to as the perovskite precursor)

## **Single-junction Flexible Perovskite Solar Cells (PSCs) Fabrication**

### **Flexible substrate slicing and cleaning**

Firstly, the etched PEN-ITO (The PEN-ITO film was cut into uniform pieces of 1.5 cm × 2 cm) was cleaned by using the detergent for 15 min, ultrapure water for 20 min, and ethanol for 20 min, sequentially.

### **Preparation of the electronic transport layer**

And then, the PEN-ITO was treated through an ultraviolet ozone (UVO) for 30 min. The  $\text{SnO}_2$  films were prepared by spin-coating the above  $\text{SnO}_2$  colloidal solution (100  $\mu\text{L}$ ) on the etched ITO substrates at 4000 rpm for 50 s and then the  $\text{SnO}_2$  films was annealed at 100 °C for 60 min. Afterwards, all the  $\text{SnO}_2$  films were exposed to UVO for 30 min.

### **Preparation of the photoactive layer**

The perovskite layers were coated by spin coating 1.6M perovskite precursor solutions in dry air(humidity was kept at about 5% RH) flowing glovebox.

Chlorobenzene (100  $\mu\text{L}$ ) was dropwise added on the substrate during the spin-coating step 15s before the end of the total procedures. The substrate was sintered at 150  $^{\circ}\text{C}$  for 15 min on a hotplate.

#### **Preparation of the pre-sewing layer**

After cooling to room temperature, HTAPF<sub>6</sub> or HTABF<sub>4</sub> solutions with different concentrations were respectively spin-coated on the perovskite layer with 3000 r.p.m. for 20 s and heated at 100  $^{\circ}\text{C}$  for 5~10 min.

#### **Preparation of the hole transport layer**

Subsequently, the hole-transporting material (HTM) solution was deposited on the perovskite layer by spin coating which was comprised of spiro-OMeTAD (80 mg), 4-tert-butylpyridine, cobalt(III) salt and lithium bis-(trifluoromethanesulfonyl)imide and in chlorobenzene solvent.

#### **Preparation of the metal electrode layer**

Finally, the films were dried under vacuum before completing the device fabrication process by thermal evaporating 80 nm of Au on top of the HTM layer.

### **Flexible Perovskite Solar Cells (F-PSCs) Module Fabrication**

Compared with the single-junction F-PSCs fabrication, the fabrication of each functional layer remains unchanged except for the amount of solution. For the 4  $\text{cm}^2$  and 10  $\text{cm}^2$  micro modules, the size of the PEN-ITO substrate used is both 4.5 $\times$ 4.5  $\text{cm}^2$ . The difference lies in the number of sub-cells, which are 4 and 6 respectively.

The precise effective area is controlled by the mask.

For the  $4.5 \times 4.5 \text{ cm}^2$  module, 800  $\mu\text{l}$  perovskite solution was used. Laser-patterning lines (P1, P2, and P3) were accomplished by the 355 nm laser beam with a power of 5 W, a current of 1A, a scribing speed of 550  $\text{mm s}^{-1}$ , and a pulse width of 20  $\mu\text{s}$ . The line widths of P1, P2, and P3 are about 70, 100, and 100  $\mu\text{m}$ , respectively. The line spacing between P1 and P2, and P2 and P3 is about 100  $\mu\text{m}$ .

## DFT calculations

**Adsorption energy:** The adsorption energy ( $E_{ads}$ ) of the complex formed between molecules A and B was calculated using the following equation:

$E_{ads} = E_{complex} - (E_A + E_B)$ , where  $E_{complex}$  is the total energy of molecular complexes A and B.  $E_A$  and  $E_B$  are the total energies of the isolated molecules A and B, respectively. The whole calculation is based on the VASP platform, and its specific parameters and boundary conditions are set according to the previously reported articles.<sup>[1-3]</sup>

**Electrostatic potential:** The electrostatic potential (ESP) of hexadecyltrimethylammonium hexafluorophosphate (HTAPF<sub>6</sub>) and hexadecyltrimethylammonium tetrafluoroborate (HTABF<sub>4</sub>) were calculated by Gaussian 16 package.<sup>[1]</sup>

## Characterization

**Photovoltaic performance:** PCEs and  $J-V$  curves were obtained via using a solar simulator (Newport, Oriel Class A, 91195A) and a source meter (Keithley 2420).

IPCE with a wavelength range from 300 to 900 nm were tested with dual Xenon/quartz halogen light source (PV Measurements, Inc.), and measured in DC mode with no bias light used. The solar simulator with 100 mW/cm<sup>2</sup> illumination AM 1.5G was calibrated via a Si-reference cell which was certified by NREL. Via masking a black mask, the devices retained an active area of 0.09 cm<sup>2</sup>.

All the tests of the micro-modules were conducted using masks to control the actual effective working area of the solar cells. In the device with an area of 0.09 cm<sup>2</sup>, the effective area is controlled by adjusting the area of the evaporation electrode.

**Morphological observation:** SEM images were performed on a field-emission scanning electron microscope (Gemini SEM 500, Zeiss, Germany) with high-resolution.

**Absorption spectrum:** The Ultraviolet–visible absorption spectra were obtained from ultraviolet-vis (UV-vis) spectrophotometer(U-3900H, HITACHI, Japan).

**Carrier dynamics:** Steady-state PL spectra were obtained from a spectrofluorometer (photon technology international). The exciting wavelength was 475 nm and excited by a standard 450 W xenon CW lamp and analyzed by the software Fluorescence. The time-resolved PL experiments were performed with the same Fluorescence Lifetime Spectrofluorometer using a pulsed source at 450 nm (the illumination source is a pulsed nitrogen dye laser) and the signal was recorded at 770 nm by the Time Correlated Single Photon Counting (TCSPC) technique.

**Photoelectron Spectroscopy:** X-ray photoelectron spectra (XPS) and Ultraviolet photoelectron spectra (UPS) measurements were collected with Thermo ESCALAB

250Xi system. X-ray diffraction (XRD) patterns with  $2\theta$  range from  $5^\circ$  to  $50^\circ$  were carried out on a Rigaku smartlab 9KW with Cu  $K\alpha$  radiation. Depth-dependent grazing incident X-ray diffraction (GIXRD) patterns with Inclination angles ( $\Psi$ ) range from  $0^\circ$  to  $30^\circ$  (step  $5^\circ$ ) were carried out on a Small Angle X-ray scatterer (SAXSpoint2.0). Contact angles were conducted on an OCA15EC contact angle measuring instrument (Dataphysics, Germany) with a drop of ultrapure water.

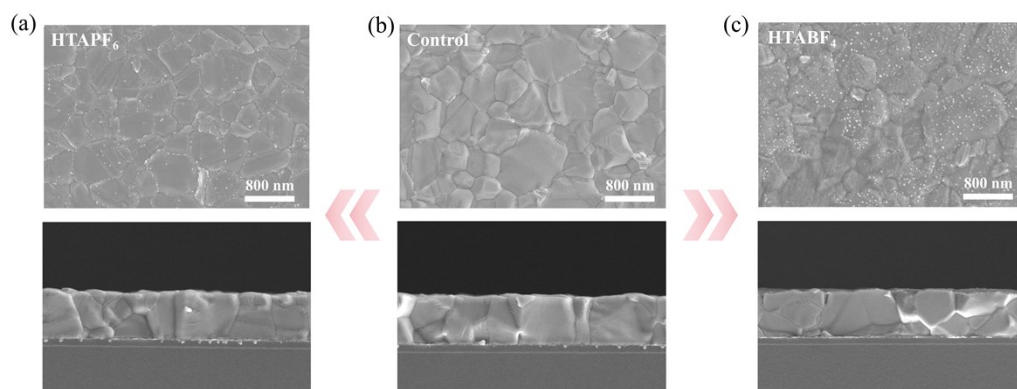

**Fig. S1** Top-view and cross-sectional SEM images of (a) HTAPF<sub>6</sub>-treated, (b) control and (c) HTABF<sub>4</sub>-treated perovskite films.

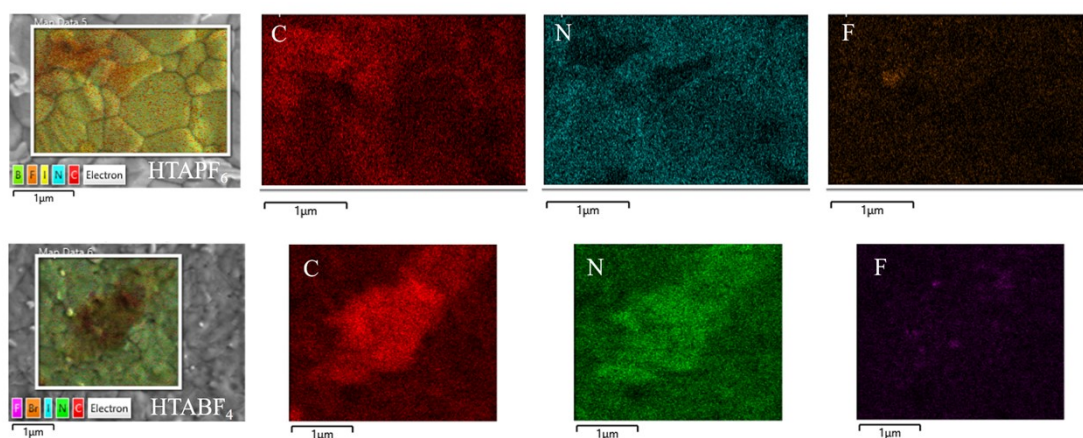

**Fig. S2** EDS images of HTAPF<sub>6</sub>-treated and HTABF<sub>4</sub>-treated perovskite films.

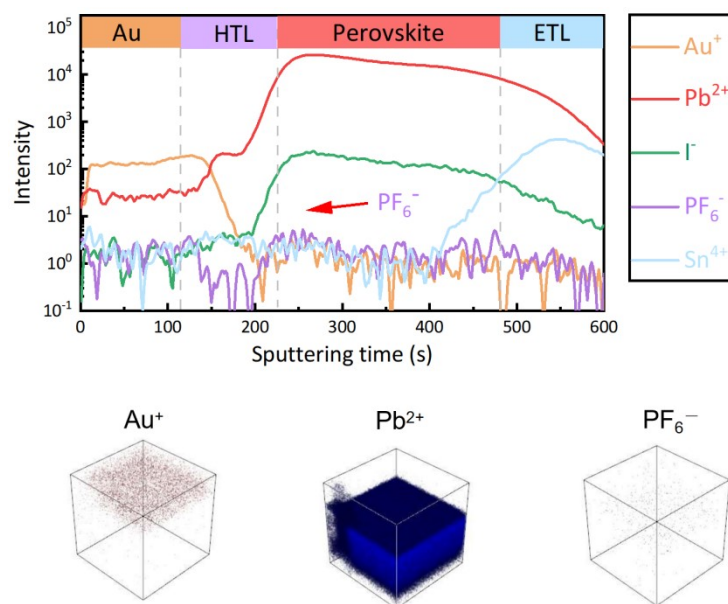

**Fig. S3** Tof-sims for 3D renders of HTAPF<sub>6</sub>-treated perovskite films.

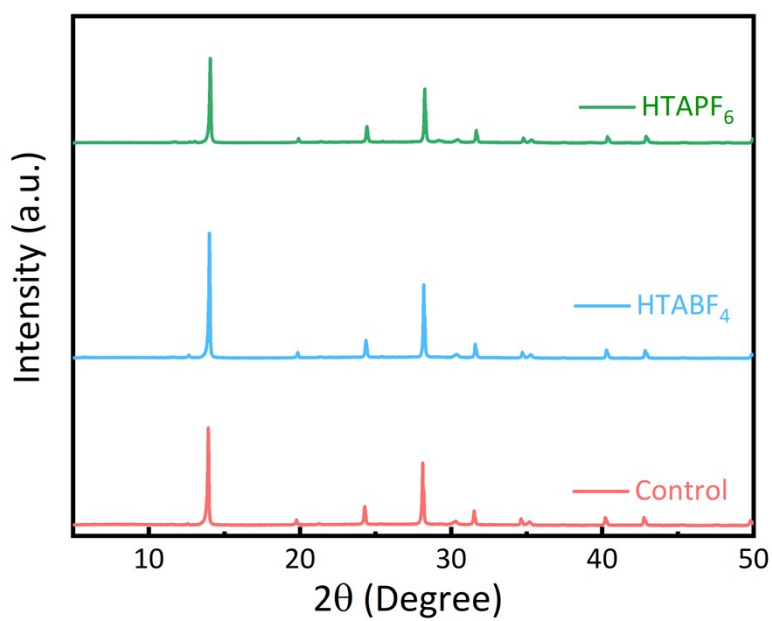

**Fig. S4** XRD patterns for control and HTAPF<sub>6</sub>/HTABF<sub>4</sub>-treated perovskite films.



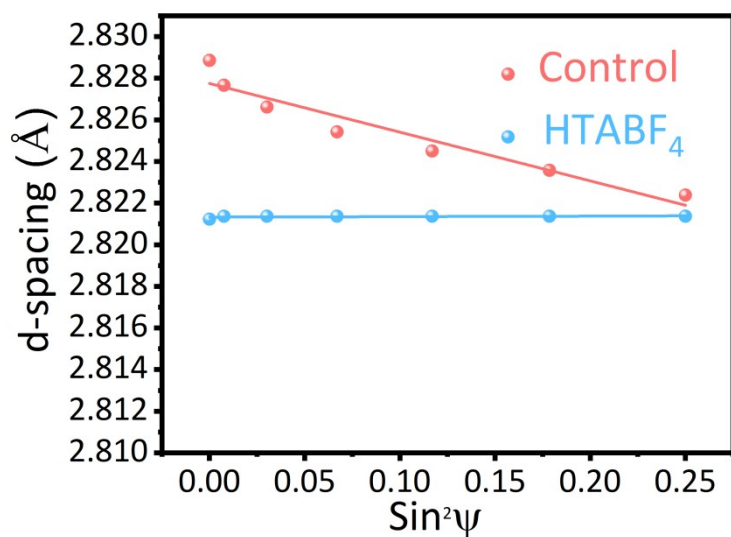

**Fig. S5**  $2\theta$ - $\sin^2(\Psi)$  curve of control and HTABF<sub>4</sub>-treated perovskite films obtained from GIXRD.

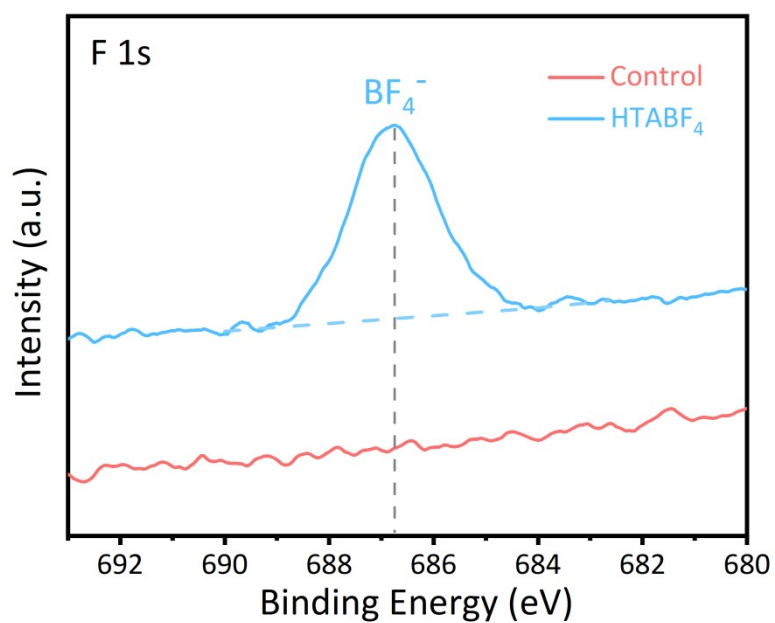

**Fig. S6** XPS characterization of F element of the control and HTABF<sub>4</sub>-treated films.

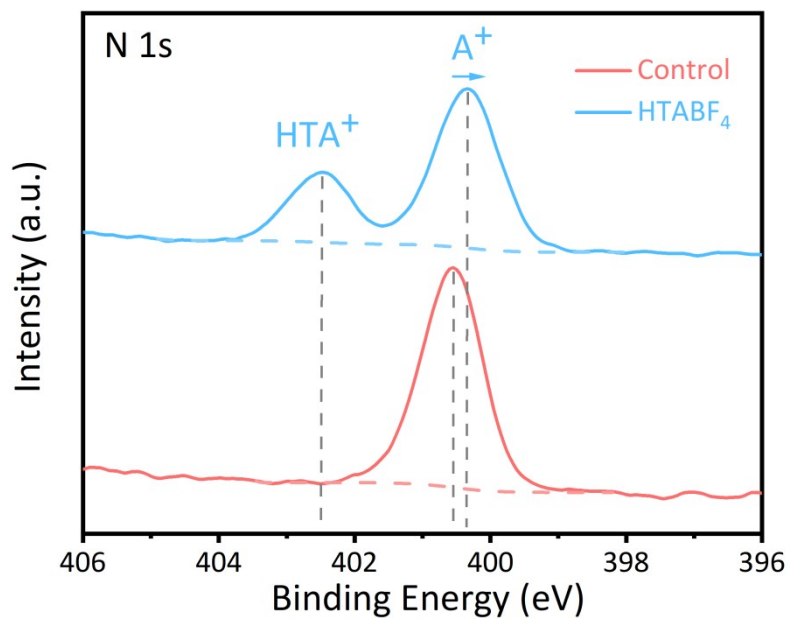

**Fig. S7** XPS characterization of N element of the control and HTABF<sub>4</sub>-treated films.

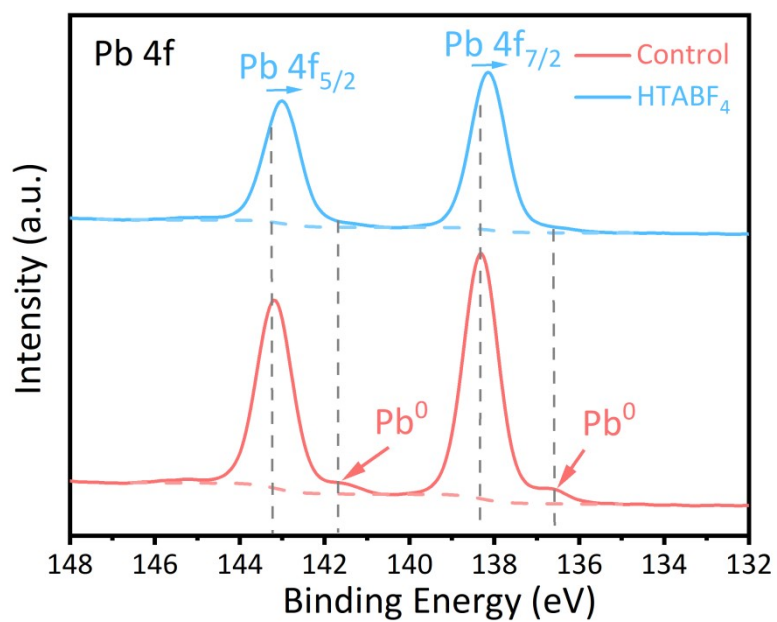

**Fig. S8** XPS characterization of Pb element of the control and HTABF<sub>4</sub>-treated films.

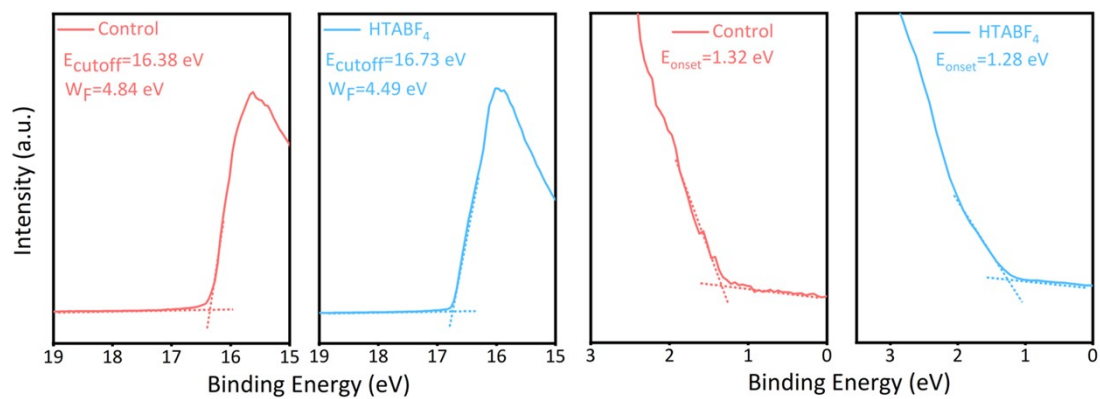

**Fig. S9** UPS spectra of control and HTABF<sub>4</sub>-treated perovskite films.

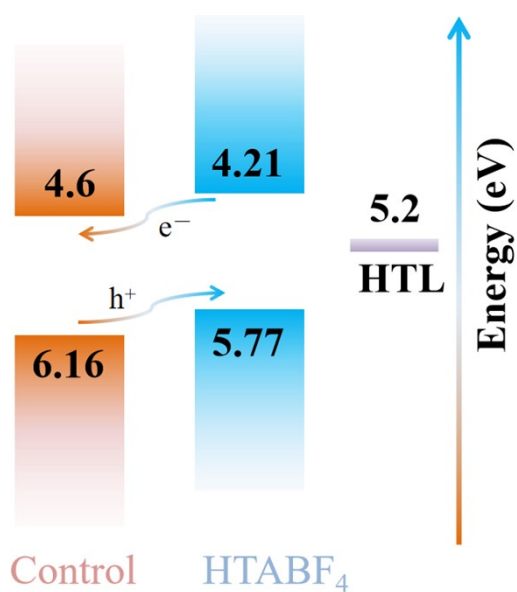

**Fig. S10** Schematic diagram of the energy level in control and HTABF<sub>4</sub>-treated perovskite films.

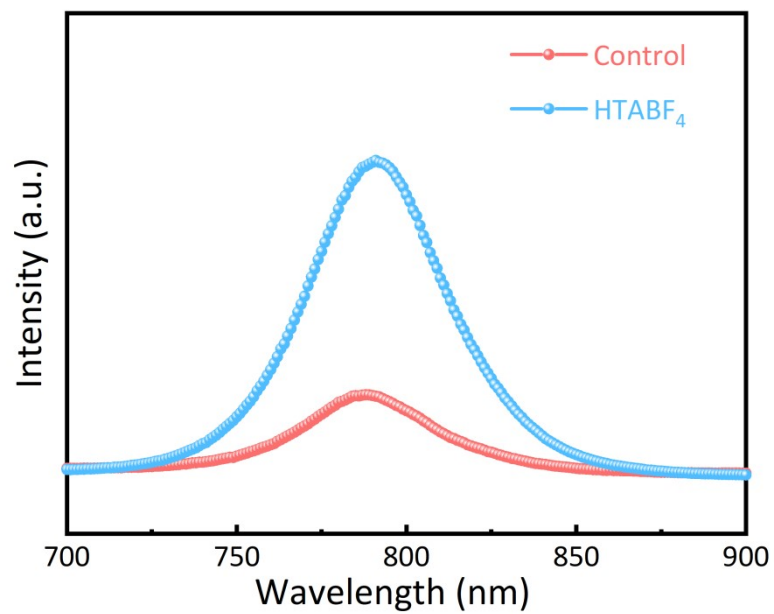

**Fig. S11** Steady-state PL spectra for control and HTABF<sub>4</sub>-treated perovskite films.

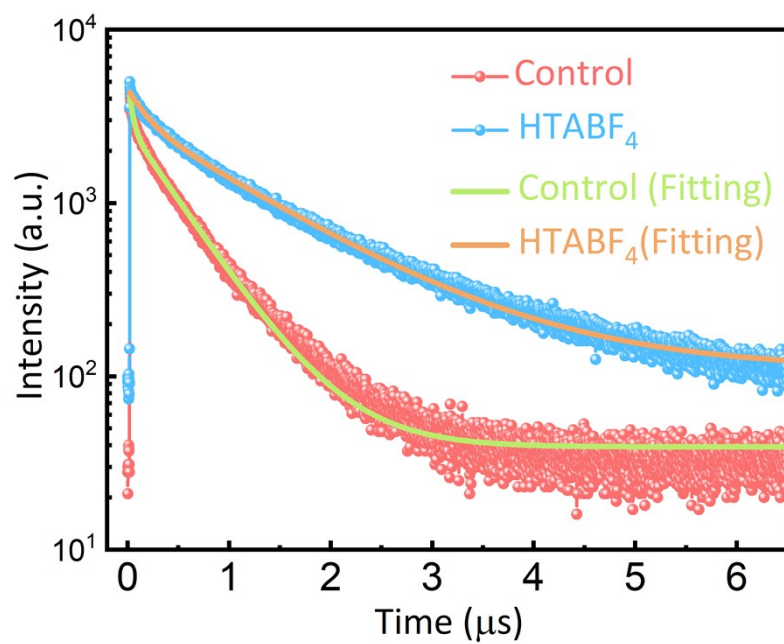

**Fig. S12** Time-resolved PL spectra for control and HTABF<sub>4</sub>-treated perovskite films.

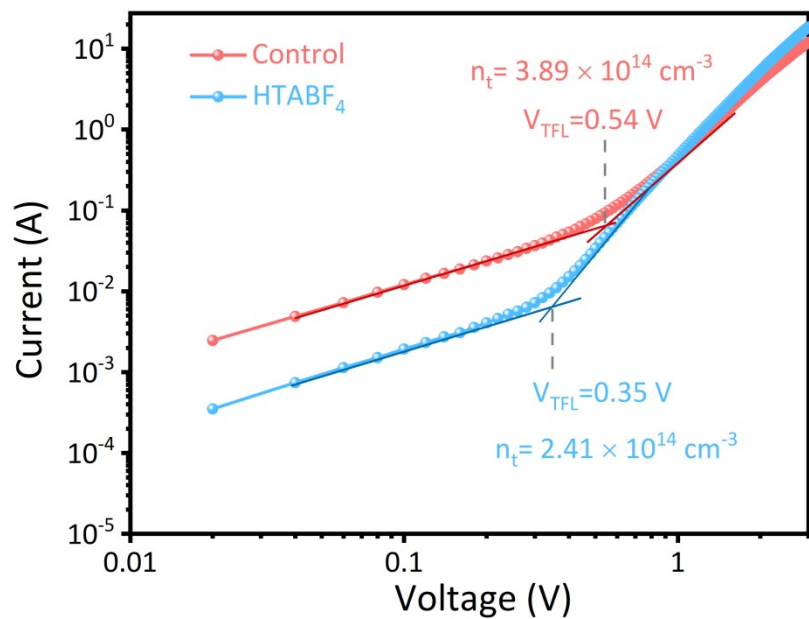

**Fig. S13** Space charge limited current (SCLC) curves of control device and HTABF<sub>4</sub>-treated device.

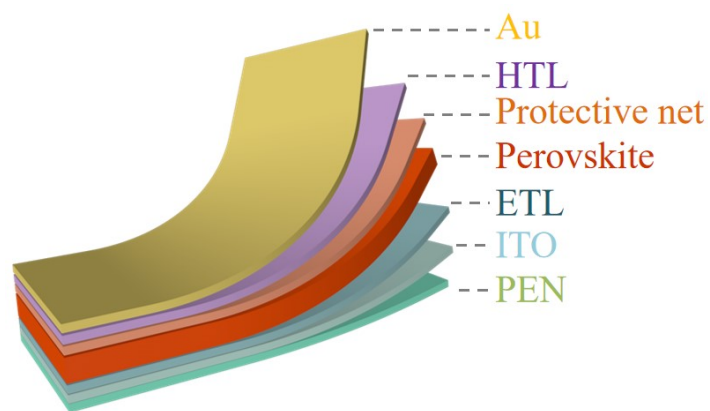

**Fig. S14** Schematic diagram of flexible perovskite solar cells.

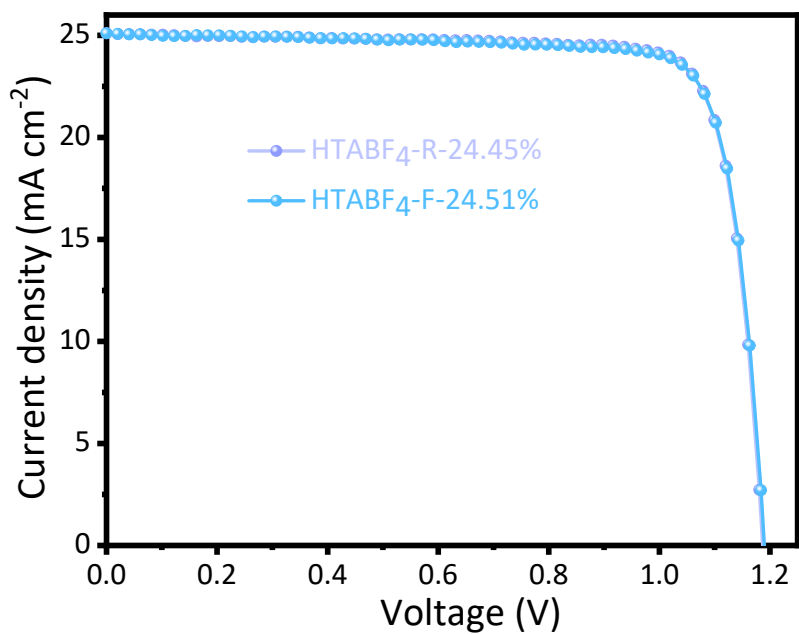

**Fig. S15**  $J$ - $V$  curves with reverse and forward scans of champion devices with HTABF<sub>4</sub>-treated.

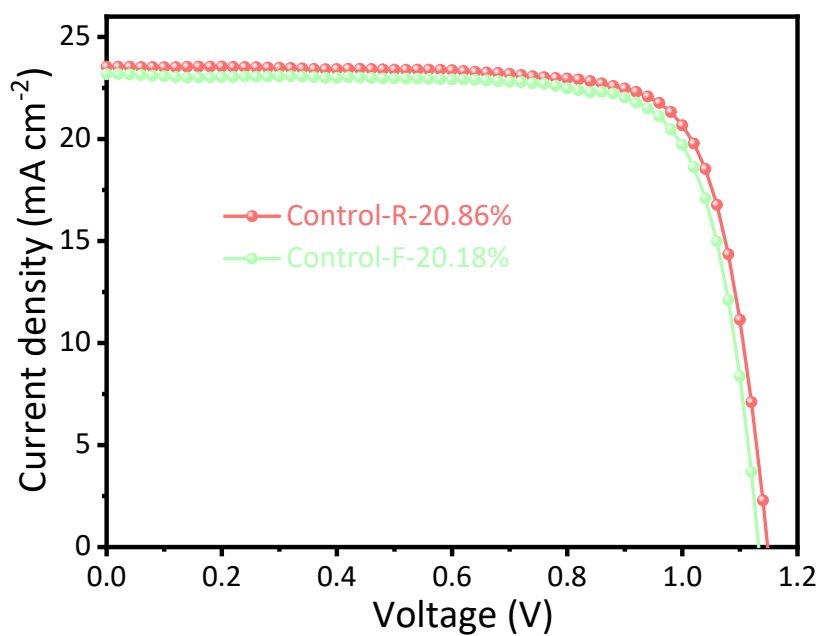

**Fig. S16**  $J$ - $V$  curves with reverse and forward scans of control device.

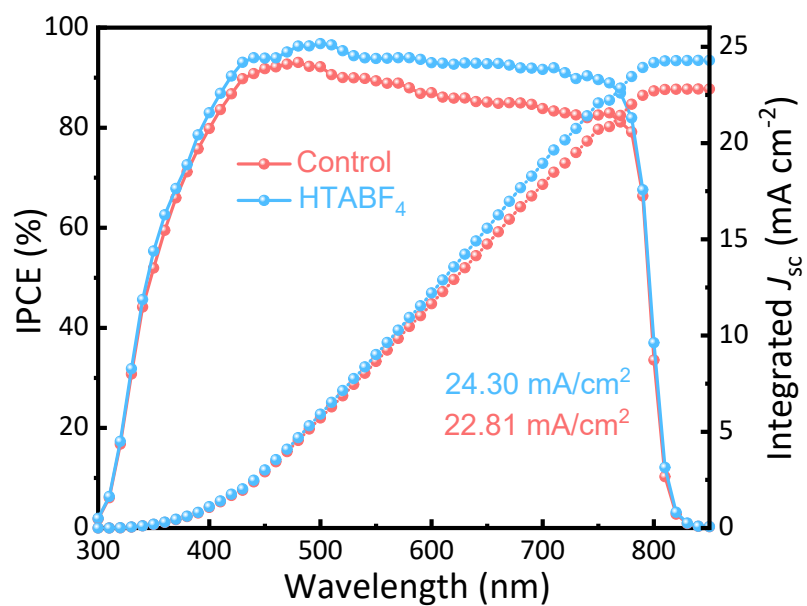

**Fig. S17** IPCE spectra of the champion devices without and with HTABF<sub>4</sub>-treated.

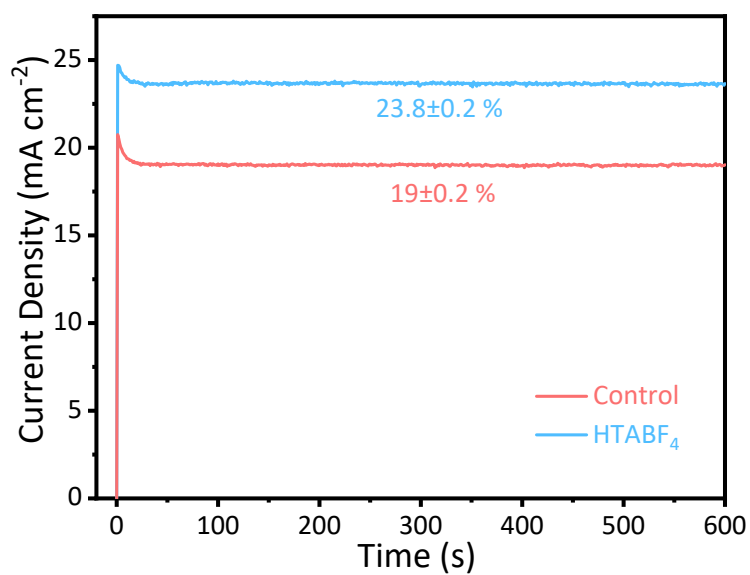

**Fig. S18** Steady-state output during measurements of the PCE for the PSCs.

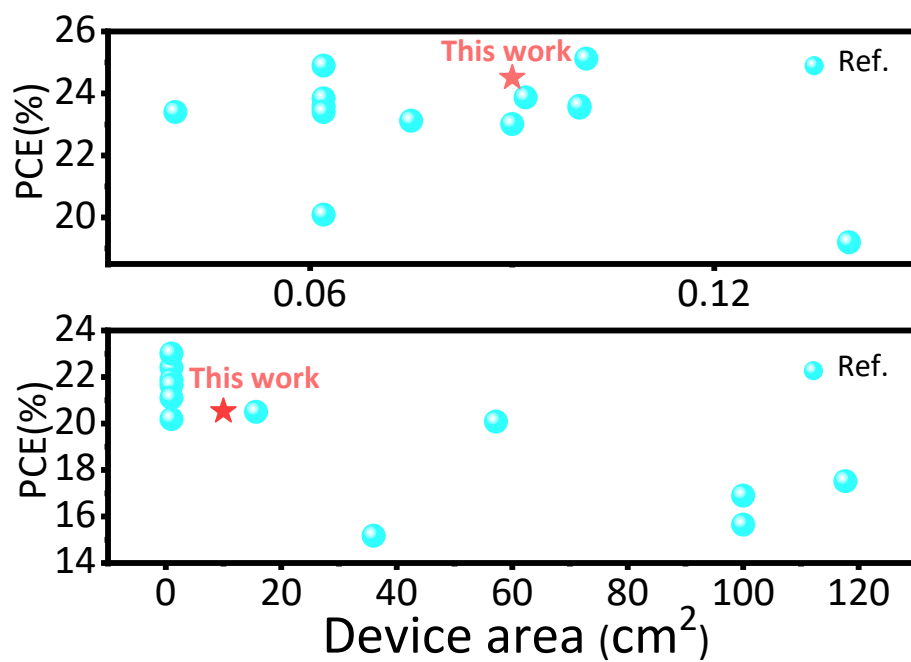

**Fig. S19** Statistical diagram of the device areas (0 to 120 cm<sup>2</sup>) and PCE values obtained from the recently reported high-performance flexible perovskite solar cells.

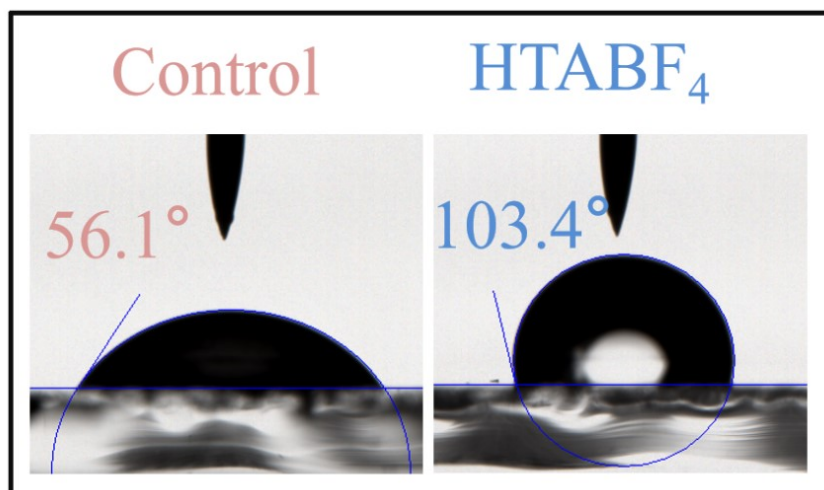

**Fig. S20** Contact angle measurement for control and HTABF<sub>4</sub>-treated perovskite films.



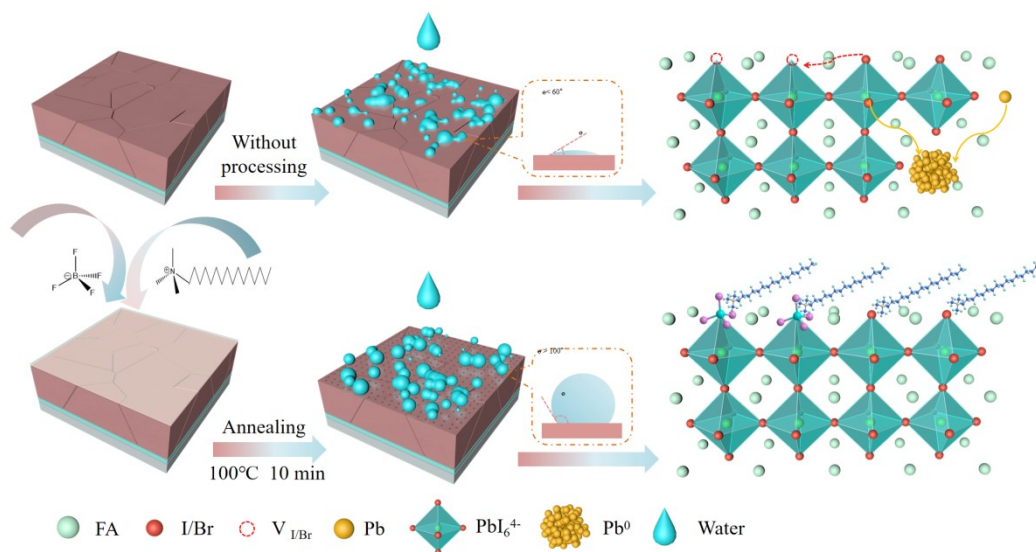

**Fig. S21** Schematic diagram of the surface hydrophobic mechanism of perovskite films.

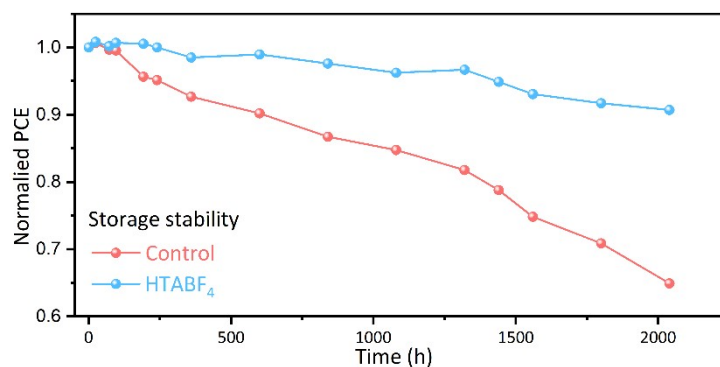

**Fig. S22** Environmental stability of unencapsulated F-PSCs with HTABF<sub>4</sub>-treated (50% relative humidity at room temperature).

**Table S1.**

Fitted results of TRPL curves in Figure 4b using a double exponential decay equation of  $I(t) = I_0 + A_1\exp(-t/\tau_1) + A_2\exp(-t/\tau_2)$ , where  $\tau_1$  and  $\tau_2$  represent fast and slow decay time constants, respectively, to quantify the carrier lifetime decay. The average time constant ( $\tau_{ave}$ ) is calculated using relation  $\tau_{ave} = (A_1\tau_1^2 + A_2\tau_2^2)/(A_1\tau_1 + A_2\tau_2)$ .

| Devices                  | $A_1$   | $\tau_1$ [ns] | $A_2$   | $\tau_2$ [ns] | $\tau_{ave}$ [ns] |
|--------------------------|---------|---------------|---------|---------------|-------------------|
| <b>Control</b>           | 2635.01 | 39.08         | 2760.73 | 495.86        | <b>463.96</b>     |
| <b>HTABF<sub>4</sub></b> | 1533.73 | 182.30        | 2945.96 | 1200.97       | <b>1126.36</b>    |

**Table S2.**

Photovoltaic parameters of the control and HTABF<sub>4</sub>-treated devices in RS under simulated AM 1.5G one sun illumination of 100 mW/cm<sup>2</sup>.

| Devices                  | $J_{sc}$ (mA/cm <sup>2</sup> ) | $V_{oc}$ (V) | FF (%)       | PCE (%)      |
|--------------------------|--------------------------------|--------------|--------------|--------------|
| <b>Control</b>           | <b>23.55</b>                   | <b>1.15</b>  | <b>77.21</b> | <b>20.86</b> |
| <b>HTABF<sub>4</sub></b> | <b>25.11</b>                   | <b>1.185</b> | <b>82.36</b> | <b>24.51</b> |

**Table S3.**

Photovoltaic parameters of the HTABF<sub>4</sub>-treated devices in RS and FS under simulated AM 1.5G one sun illumination of 100 mW/cm<sup>2</sup>.

| Devices                    | $J_{sc}$ (mA/cm <sup>2</sup> ) | $V_{oc}$ (V) | FF (%)       | PCE (%)      |
|----------------------------|--------------------------------|--------------|--------------|--------------|
| <b>HTABF<sub>4</sub>-F</b> | <b>25.10</b>                   | <b>1.19</b>  | <b>82.01</b> | <b>24.45</b> |
| <b>HTABF<sub>4</sub>-R</b> | <b>25.11</b>                   | <b>1.185</b> | <b>82.36</b> | <b>24.51</b> |

**Table S4.**

Photovoltaic parameters of the control devices in RS and FS under simulated AM 1.5G one sun illumination of 100 mW/cm<sup>2</sup>.

| Devices          | $J_{sc}$ (mA/cm <sup>2</sup> ) | $V_{oc}$ (V) | FF (%)       | PCE (%)      |
|------------------|--------------------------------|--------------|--------------|--------------|
| <b>Control-F</b> | <b>23.18</b>                   | <b>1.13</b>  | <b>76.96</b> | <b>20.18</b> |
| <b>Control-R</b> | <b>23.55</b>                   | <b>1.15</b>  | <b>77.21</b> | <b>20.86</b> |

**Table S5.**

Photovoltaic parameters of the HTABF<sub>4</sub>-treated module (4cm<sup>2</sup>) devices in RS and FS under simulated AM 1.5G one sun illumination of 100 mW/cm<sup>2</sup>.

| Modules (4)                | $J_{sc}$ (mA/cm <sup>2</sup> ) | $V_{oc}$ (V) | FF (%)       | PCE (%)      |
|----------------------------|--------------------------------|--------------|--------------|--------------|
| <b>HTABF<sub>4</sub>-F</b> | <b>6.22</b>                    | <b>4.58</b>  | <b>79.06</b> | <b>22.43</b> |
| <b>HTABF<sub>4</sub>-R</b> | <b>6.22</b>                    | <b>4.59</b>  | <b>79.42</b> | <b>22.68</b> |

**Table S6.**

Photovoltaic parameters of the HTABF<sub>4</sub>-treated module (10cm<sup>2</sup>) devices in RS and FS under simulated AM 1.5G one sun illumination of 100 mW/cm<sup>2</sup>.

| Modules (10<br>)           | $J_{sc}$ (mA/cm <sup>2</sup> ) | $V_{oc}$ (V) | FF (%)       | PCE (%)      |
|----------------------------|--------------------------------|--------------|--------------|--------------|
| <b>HTABF<sub>4</sub>-F</b> | <b>3.92</b>                    | <b>6.92</b>  | <b>73.53</b> | <b>19.94</b> |
| <b>HTABF<sub>4</sub>-R</b> | <b>3.93</b>                    | <b>6.95</b>  | <b>75.23</b> | <b>20.53</b> |

**Table S7.** Summary of recently reported flexible perovskite solar cells.

| Summary of Air-Processed Flexible Perovskite Solar Cells |                    |                              |                              |                                                   |
|----------------------------------------------------------|--------------------|------------------------------|------------------------------|---------------------------------------------------|
| Device structure                                         | Device fabrication | Small-area (PCE%)            | Large-area (PCE%)            | Periodical information                            |
| n-i-p                                                    | spin-coating       | 0.092cm <sup>2</sup> (23.87) | 1cm <sup>2</sup> (22.41)     | Advanced Materials, 2025, 37, 2418791             |
| n-i-p                                                    | spin-coating       | Not specified (24.43)        | 1cm <sup>2</sup> (23.01)     | Nature Communications, 2025, 16.1: 1771           |
| n-i-p                                                    | blade-coating      | 0.1cm <sup>2</sup> (23.54)   | 57.2cm <sup>2</sup> (20.08)  | Joule, 2025, 9.5                                  |
| p-i-n                                                    | spin-coating       | 0.14cm <sup>2</sup> (19.2)   | /                            | Chemical Engineering Journal, 2025, 164371        |
| n-i-p                                                    | blade-coating      | /                            | 100cm <sup>2</sup> (15.65)   | Advanced Functional Materials, 2025, 35, 2424191  |
| n-i-p                                                    | blade-coating      | 0.101cm <sup>2</sup> (25.12) | 100cm <sup>2</sup> (16.99)   | Advanced Materials, 2025, 37, 2417779             |
| n-i-p                                                    | spin-coating       | 0.075cm <sup>2</sup> (23.12) | /                            | ACS Nano, 2025, 19, 4867-4875                     |
| n-i-p                                                    | spin-coating       | 0.062cm <sup>2</sup> (24.9)  | 15.64cm <sup>2</sup> (20.5)  | Advanced Materials, 2024, 36, 2403531             |
| n-i-p                                                    | blade-coating      | 0.09cm <sup>2</sup> (23.01)  | 117.7cm <sup>2</sup> (17.52) | Energy Environmental Science, 2024, 17, 7069-7080 |
| n-i-p                                                    | spin-coating       | 0.04cm <sup>2</sup> (23.4)   | /                            | Nano-Micro Letter, 2024,16, 178                   |
| n-i-p                                                    | spin-coating       | 0.062cm <sup>2</sup> (20.09) | /                            | Advanced Functional Materials, 2024, 34, 2406354  |
| n-i-p                                                    | spin-coating       | 0.062cm <sup>2</sup> (23.57) | 1.004cm <sup>2</sup> (21.87) | ACS Energy Letter, 2023, 8, 3750-3759             |
| n-i-p                                                    | spin-coating       | 0.062cm <sup>2</sup> (23.84) | 1.004cm <sup>2</sup> (21.66) | Advanced Materials, 2023, 35, 2300513             |
| n-i-p                                                    | spin-coating       | 0.062cm <sup>2</sup> (23.4)  | 1cm <sup>2</sup> (21.1)      | Joule,2023, 7, 398-415                            |
| n-i-p                                                    | spin-coating       | 0.1cm <sup>2</sup> (23.6)    | 1cm <sup>2</sup> (20.19)     | The Innovation, 2022, 3.6                         |
| p-i-n                                                    | blade-coating      | /                            | 36cm <sup>2</sup> (15.17)    | Nature Communications, 2020, 11: 3016.            |

|              |                     |                                  |                                |                  |
|--------------|---------------------|----------------------------------|--------------------------------|------------------|
| <b>n-i-p</b> | <b>spin-coating</b> | <b>0.09cm<sup>2</sup>(24.51)</b> | <b>10cm<sup>2</sup>(20.53)</b> | <b>This work</b> |
|--------------|---------------------|----------------------------------|--------------------------------|------------------|

## References

- [1] L. Chen, P. B. Ingabire, J. Sun, Z. Gu, J. Xi, L. Qiu, B. Bai, X. Yin, L. Song, J. Xiong, C. Cui, P. Du, *Adv. Funct. Mater.* **2025**, e21907.
- [2] Y. Zhang, T. Kong, H. Xie, J. Song, Y. Li, Y. Ai, Y. Han and D. Bi, *ACS Energy Lett.* 2022, 7, 929-938.
- [3] G. Liu, H. Zheng, J. Ye, S. Xu, L. Zhang, H. Xu, Z. Liang, X. Chen and Xu Pan, *ACS Energy Lett.* 2021, 6, 4395-4404.
